# Supplementary material
Source: PubMed Central journal article supplement (PMC4105219)
Supplement: NIHMS58412-supplement-1.pdf [file NIHMS58412-supplement-1.pdf]

# Cyclo[*n*]pyrroles: Size and Site Specific Binding to G-Quadruplexes

*Erin Shammel Baker,<sup>†</sup> Jeong T. Lee,<sup>‡</sup> Jonathan L. Sessler<sup>‡,\*</sup> and Michael T. Bowers<sup>†,\*</sup>*

<sup>†</sup> Department of Chemistry and Biochemistry, University of California, Santa Barbara, CA, 93106-9510

<sup>‡</sup> Department of Chemistry and Biochemistry and Institute for Cellular and Molecular Biology, 1  
University Station – A5300, University of Texas at Austin, Austin, TX, 78712-0165.

E-mail: sessler@mail.utexas.edu; bowers@chem.ucsb.edu

## Supporting Information

### Full Reference

48. Case, D. A.; Pearlman, D. A.; Caldwell, J. W.; Cheatham III, T. E.; Wang, J.; Ross, W. S.; Simmerling, C. L.; Darden, T. A.; Merz, K. M.; Stanton, R. V.; Cheng, A. L.; Vincent, J. J.; Crowley, M.; Tsui, V.; Gohlke, H.; Radmer, R. J.; Duan, Y.; Pitera, J.; Massova, I.; Seibel, G. L.; Singh, U. C.; Weiner, P. K.; Kollman, P. A. AMBER 7; University of California: San Francisco, 2002.
